# Supplementary material
Source: Elsevier journal article supplement (https://www.sciencedirect.com/science/article/pii/S0212656715000062)
Supplement: mmc2 [file S0212656715000062:mmc2.doc]

**ANEXO II**

| **Riesgos, cuestiones y temas de Eduación para la salud** |
| --- |
| 1. Alcohol y tabaco (97%) 2. Otras drogas (95%) 3. Alimentación y nutrición (93%) 4. Violencia (92%) 5. Anorexia y bulimia (92%) 6. Relaciones personales, sexualidad y prevención del embarazo no deseado (91%) 7. Cuidado del media ambiente (90%) 8. Sida y otras ETS (87%) 9. Diálogo y resolución de conflictos (87%) 10. Diálogo y resolución de conflictos (87%) 11. Salud mental, manejo de la ansiedad, autoestima, suicidio, etc. (87%) 12. Ocio sedentario TV, ordenador, videoconsola, etc. (85%) 13. Salud bucodental e higiene (85%) 14. Actividad física, descanso y sueño (84%) 15. Primeros auxilios (84%) 16. Hábitos sociales no saludables (83%)   Otros temas: Mejora del propio ambiente escolar; Crecimiento, cambios físicos y psicológicos en la adolescencia; Toma de decisiones; Ergonomía e higiene postural; Preparación para la vida laboral; Asertividad y defensa de uno mismo; Vacunación; Prevención de accidentes de tráfico; Cuidados de la vista y el oído; Prevención de enfermedades e intoxicaciones; Factores de riesgo de infarto cardiaco y cáncer; Critica de medios de comunicación; Seguridad en el lugar de trabajo; Planificación familiar; y Prevención de accidentes en el hogar. |
